# Supplementary material
Source: PubMed Central journal article supplement (PMC6593879)
Supplement: fj.201801881RR.st1.pdf [file fj.201801881RR.st1.pdf]

**Supplementary Table 1.** The sequence of four guide RNAs (sg143-146) are shown.

|              |                         |                      |
|--------------|-------------------------|----------------------|
| <b>sg143</b> | <b>Targeting Exon 1</b> | GGCCTTGGAGAGGATCCAAC |
| <b>sg144</b> |                         | ACACTCGGCACTGGAGCGAG |
| <b>sg145</b> | <b>Targeting Exon 2</b> | TCTCCAAGGCCCATCTACC  |
| <b>sg146</b> |                         | CGCTCCAGTGCCGAGTGTG  |

**Supplementary Table 2.** The primer sequences used for detection of 519 bp deletion from Nr2e3 gene.

|                  |                       |
|------------------|-----------------------|
| <b>Nr2e3 (F)</b> | CAAGCAGGCTACCCTTAGGAC |
| <b>Nr2e3 (R)</b> | TCTCCGCTTTCCTGAACG    |

**Supplementary Table 3.** Top ten off target sequences by sgRNA 143, 144, 145 and 146

| SgRNA | Target sequence                 | Off-Target sequence             | No. of Mismatches | Off target score (MIT) | Off target score (CFD) | Chr No. | Start         | End           | Strand | Gene affected               |
|-------|---------------------------------|---------------------------------|-------------------|------------------------|------------------------|---------|---------------|---------------|--------|-----------------------------|
| sg143 | GGCCTTGGA<br>GAGGATCCA<br>ACAGG | TGCCTTTCAGA<br>GGATCCA<br>ACTGG | 3                 | 1.737                  | 0.352                  | chr19   | 56218<br>142  | 56218<br>164  | -      | intergenic:Tcf7l2-Gm22271   |
|       | GGCCTTGGA<br>GAGGATCCA<br>ACAGG | AGCTTTGGAGG<br>GGATCCA<br>ACTGG | 3                 | 1.562                  | 0.468                  | chr7    | 25047<br>295  | 25047<br>317  | +      | intron:Grik5                |
|       | GGCCTTGGA<br>GAGGATCCA<br>ACAGG | GGCTGTGTACA<br>GGATCCA<br>AACC  | 4                 | 1.257                  | 0.128                  | chr8    | 25823<br>667  | 25823<br>689  | +      | intron:Ash2l                |
|       | GGCCTTGGA<br>GAGGATCCA<br>ACAGG | GCCTTTCAAA<br>GGATCCA<br>AACAG  | 4                 | 0.859                  | 0.227                  | chr11   | 27750<br>219  | 27750<br>241  | -      | intergenic:Gm3810-Gm12079   |
| sg144 | AACTCGGC<br>ACTGGAGCG<br>AGGGG  | AAACTCGGCAC<br>TGGAGCGAGGG<br>G | 1                 | 100.00<br>0            | 0.727                  | chr15   | 35733<br>608  | 35733<br>630  | -      | intron:Vps13b               |
|       | AACTCGGC<br>ACTGGAGCG<br>AGGGG  | ACACGCAGCAG<br>TGGAGCGAGGG<br>G | 3                 | 0.964                  | 0.160                  | chr4    | 82890<br>82   | 82891<br>04   | -      | intergenic:Car8-Gm11810     |
|       | AACTCGGC<br>ACTGGAGCG<br>AGGGG  | ACAACTTCACT<br>GGAGCGAGGG<br>G  | 4                 | 0.891                  | 0.150                  | chr14   | 25647<br>666  | 25647<br>688  | -      | exon:Zmiz1                  |
|       | AACTCGGC<br>ACTGGAGCG<br>AGGGG  | GCACTCAGCAC<br>TGGAGTGTAGT<br>G | 3                 | 0.881                  | 0.467                  | chr8    | 94842<br>490  | 94842<br>512  | +      | intergenic:Ciapi1/Coq9-Coq9 |
| sg145 | TCTCCAAGG<br>CCCCATCTA<br>CCTGG | TCTCCAGGGCC<br>ACATCTACCTG<br>G | 2                 | 2.128                  | 0.504                  | chr13   | 49255<br>151  | 49255<br>173  | +      | intergenic:Susd3-Fgd3       |
|       | TCTCCAAGG<br>CCCCATCTA<br>CCTGG | TGTCCAAAGCC<br>CCATCTACTAG<br>G | 3                 | 1.492                  | 0.209                  | chr1    | 65572<br>910  | 65572<br>932  | +      | intergenic:Gm8805-Crygf     |
|       | TCTCCAAGG<br>CCCCATCTA<br>CCTGG | CCTCCAAGGCC<br>CCATCAACCAG<br>A | 2                 | 1.180                  | 0.032                  | chr3    | 88075<br>314  | 88075<br>336  | -      | exon:Ttc24                  |
|       | TCTCCAAGG<br>CCCCATCTA<br>CCTGG | TCTCACAGACC<br>CATCTACCTGG      | 4                 | 0.859                  | 0.303                  | chr18   | 42749<br>124  | 42749<br>146  | -      | intron:Ppp2r2b              |
| sg146 | CGCTCCAGT<br>GCCGAGTGT<br>GTGGG | CACTTCAGTGC<br>CAAGTGTGTGG<br>G | 3                 | 1.089                  | 0.497                  | chr18   | 31448<br>533  | 31448<br>555  | -      | exon:Gm26658/Syt4           |
|       | CGCTCCAGT<br>GCCGAGTGT<br>GTGGG | CTCTCCAGTCC<br>CAAGTGTGTGG<br>G | 3                 | 1.003                  | 0.235                  | chr7    | 13357<br>6523 | 13357<br>6545 | -      | intergenic:Ctbp2-Tex36      |
|       | CGCTCCAGT<br>GCCGAGTGT<br>GTGGG | CTATCCAATGCT<br>GAGTGTGTAGG     | 4                 | 0.694                  | 0.297                  | chr14   | 54071<br>947  | 54071<br>969  | +      | intergenic:Trdv2-2-Trdv4    |
|       | CGCTCCAGT<br>GCCGAGTGT<br>GTGGG | CAGGCCAGTGC<br>AGAGTGTGTGG<br>G | 4                 | 0.694                  | 0.189                  | chr16   | 86673<br>96   | 86674<br>18   | +      | intron:Carhsp1              |

**Supplementary Table 5.** Targeted mouse or human gene specific ChIP primer sequences

| ChIP Primers               |         | Sequences 5'-3'       |
|----------------------------|---------|-----------------------|
| mouse Dino (-213 ~ +63)    | Forward | CGCTGCGTGACAAGAGAATA  |
|                            | Reverse | TGTCTGGATATCGCTGTGGA  |
| mouse Dino (-1808 ~ -1521) | Forward | CTCTTGTGCCGTCTCTGACA  |
|                            | Reverse | GGAAAAGCATCTTGGAGCTG  |
| mouse Dino (+1377 ~ +1559) | Forward | GATTGTGGCTAAACCCCAAG  |
|                            | Reverse | CTTCAAGGCAGTGGGAGAAG  |
| mouse Bax (-952 ~ -757)    | Forward | AGTGCAGGTTGGTTTTGAGC  |
|                            | Reverse | GATGCCAGAGTTGGTTGTT   |
| mouse Bak1(-284 ~ -36)     | Forward | GAAAGCGGGTAGAGGGGTAG  |
|                            | Reverse | CTGCAGGGACTGATCTCAAA  |
| Human DINO (-692 ~ -497)   | Forward | TACTCCACTCCGCTTTCCCTC |
|                            | Reverse | TACAGGAATCCCTGGTCACG  |

**Supplementary Table 6.** ChIP-grade antibodies used for ChIP assay. The amount used for each ChIP reaction and supplier information were shown.

| ChIP-Grade Antibody | Supplier                  | Catalogue # (Clone) | Amount per reaction |
|---------------------|---------------------------|---------------------|---------------------|
| NR2E3               | Santa Cruz Biotech, Inc.  | sc-292264           | 3 µg                |
| NR2E3               | Aviva Systems Biology     | ARP39069            | 3 µg                |
| Sp1                 | Active Motif              | 39058               | 3 µg                |
| H4Ac                | Active Motif              | 39243               | 3 µg                |
| H3K4me3             | Active Motif              | 39159               | 5 µg                |
| H3K4me2             | Active Motif              | 39141               | 5 µg                |
| LSD1                | Active Motif              | 39186               | 5 µg                |
| LSD1                | Cell Signaling Technology | 2139                | 3 µg                |
| H3K9me3             | EpiGentek Group, Inc.     | A-4036              | 3 µg                |
| RNA pol II          | EpiGentek Group, Inc.     | A-2032              | 3 µg                |
| p53                 | Cell Signaling Technology | 2524 (1C12)         | 3 µg                |

**Supplementary Table 7.** The primer sequences used in chromatin accessibility assay.

| Chromatin accessibility Primers     |         | Sequences 5'-3'       |
|-------------------------------------|---------|-----------------------|
| mouse Dino ChAc I(-1475 ~ -1290)    | Forward | ACCAGGCTGGATCGTGTAAC  |
|                                     | Reverse | TTGGGGTCTTTTGAGACGAG  |
| mouse Dino ChAc II (-356 ~ -105)    | Forward | CCCGAAACCCAGGATTTTAT  |
|                                     | Reverse | CCTCCCCTCTGGGAATCTAA  |
| mouse Dino ChAc III (+1232 ~ +1384) | Forward | CCACACCCAGTGTAGGAAGG  |
|                                     | Reverse | ACGTAGGGGACAGAGGAAGC  |
| Human DINO ChAc (-653 ~ -496)       | Forward | TACTCCACTCCGCTTTCCCTC |
|                                     | Reverse | TACAGGAATCCCTGGTCACG  |

**Supplementary Table 8.** Targeted mouse or human gene specific primer sequences

| Primers                           |         | Sequences 5'-3'         |
|-----------------------------------|---------|-------------------------|
| mouse Nrf2                        | Forward | CTTTAGTCAGCGACAGAAGGAC  |
|                                   | Reverse | AGGCATCTTGTTTGGGAATGTG  |
| mouse Trp53                       | Forward | CTCTCCCCCGCAAAGAAAAA    |
|                                   | Reverse | CGGAACATCTCGAAGCGTTTA   |
| mouse Cyp2e1                      | Forward | CGTTGCCTTGCTTGTCTGGA    |
|                                   | Reverse | AAGAAAGGAATTGGGAAAGGTCC |
| mouse Gclc                        | Forward | GGGGTGACGAGGTGGAGTA     |
|                                   | Reverse | GTTGGGGTTTGTCTCTCCC     |
| mouse mdm2                        | Forward | TGTCTGTGTCTACCGAGGGTG   |
|                                   | Reverse | TCCAACGGACTTTAACAACTTCA |
| mouse GAPDH                       | Forward | GCACAGTCAAGGCCGAGAAT    |
|                                   | Reverse | GCCTTCTCCATGGTGGTGAA    |
| mouse Heme oxygenase 1<br>(Hmox1) | Forward | AGGTACACATCCAAGCCGAGA   |
|                                   | Reverse | CATCACCAGCTTAAAGCCTTCT  |
| mouse p21                         | Forward | CCTGGTGATGTCCGACCTG     |
|                                   | Reverse | CCATGAGCGCATCGCAATC     |
| mouse Bax                         | Forward | AGACAGGGGCCTTTTTGCTAC   |
|                                   | Reverse | AATTCGCCGGAGACACTCG     |
| mouse Bak1                        | Forward | CAGCTTGCTCTCATCGGAGAT   |
|                                   | Reverse | GGTGAAGAGTTCGTAGGCATTC  |
| Human p53                         | Forward | CCGCAGTCAGATCCTAGCG     |
|                                   | Reverse | AATCATCCATTGCTTGGGACG   |

**Supplementary Table 9.** Antibodies used for immunoblotting. Optimized incubation buffer, concentration, and supplier information were shown.

| Antibody | Supplier                  | Catalogue #<br>(Clone) | Dilution | Incubation solution      |
|----------|---------------------------|------------------------|----------|--------------------------|
| NR2E3    | Aviva Systems Biology     | ARP39069               | 1/1000   | TBST (0.05%) and 5% milk |
| ESR1     | Santa Cruz Biotech, Inc.  | sc-543                 | 1/1000   | TBST (0.05%) and 5% milk |
| AHR      | Santa Cruz Biotech, Inc.  | sc-133088              | 1/1000   | TBST (0.05%) and 5% milk |
| Actin    | Santa Cruz Biotech, Inc.  | sc-1616                | 1/1000   | TBST (0.05%) and 5% milk |
| Gclc     | Proteintech               | 12601-1-AP             | 1/1000   | TBST (0.05%) and 5% milk |
| Ho-1     | Proteintech               | 10701-1-AP             | 1/1000   | TBST (0.05%) and 5% milk |
| p53      | Proteintech               | 10442-1-AP             | 1/1000   | TBST (0.05%) and 5% milk |
| p53      | Santa Cruz Biotech, Inc.  | sc-126(DO-1)           | 1/1000   | TBST (0.05%) and 5% milk |
| p21      | Proteintech               | 60214-1-Ig             | 1/1000   | TBST (0.05%) and 5% milk |
| Bax      | Cell Signaling Technology | 14796                  | 1/1000   | PBST (0.05%) and 5% milk |
| Bak1     | Cell Signaling Technology | 12105                  | 1/1000   | PBST (0.05%) and 5% milk |
| CYP2E1   | Enzo Life Sciences, Inc.  | BML-CR3271             | 1/1000   | TBST (0.05%) and 5% milk |
| NRF2     | Cell Signaling Technology | 12721                  | 1/1000   | PBST (0.05%) and 5% milk |
| pJNK     | Cell Signaling Technology | 9255                   | 1/1000   | PBST (0.05%) and 5% milk |
| JNK      | Cell Signaling Technology | 9252                   | 1/1000   | PBST (0.05%) and 5% milk |
